# Supplementary material
Source: publisher site journal article supplement (https://www.dovepress.com/article/312361)
Supplement: Supplementary file 1 [file get_supplementary_file.php]

**Table S1- *P value of correlation analysis in Figure 6***

|  | FEV25 | FEV50 | FEV75 | FVC | MMEF | FEF25 | FEF50 | FEF75 | IL-4 | IL-5 | IL-13 | IL-17A | TNF-α | Muc5ac |
| --- | --- | --- | --- | --- | --- | --- | --- | --- | --- | --- | --- | --- | --- | --- |
| FEV25 | 0.0000 |  |  |  |  |  |  |  |  |  |  |  |  |  |
| FEV50 | 0.1130 |  |  |  |  |  |  |  |  |  |  |  |  |  |
| FEV75 | 0.0626 | 0.0229 |  |  |  |  |  |  |  |  |  |  |  |  |
| FVC | 0.2479 | 0.5561 | 0.2149 |  |  |  |  |  |  |  |  |  |  |  |
| MMEF | 0.0220 | 0.0018 | 0.0235 | 0.7166 |  |  |  |  |  |  |  |  |  |  |
| FEF25 | 0.3708 | 0.0107 | 0.0358 | 0.0844 | 0.0084 |  |  |  |  |  |  |  |  |  |
| FEF50 | 0.0150 | 0.0003 | 0.0077 | 0.8020 | 0.0000 | 0.0173 |  |  |  |  |  |  |  |  |
| FEF75 | 0.3813 | 0.0839 | 0.1169 | 0.5334 | 0.0716 | 0.0188 | 0.0196 |  |  |  |  |  |  |  |
| IL-4 | 0.1013 | 0.0105 | 0.0327 | 0.8134 | 0.0004 | 0.0008 | 0.0089 | 0.1263 |  |  |  |  |  |  |
| IL-5 | 0.0084 | 0.0119 | 0.0076 | 0.3560 | 0.0001 | 0.0153 | 0.0002 | 0.0499 | 0.0000 |  |  |  |  |  |
| IL-13 | 0.2369 | 0.1224 | 0.1391 | 0.9482 | 0.0008 | 0.0335 | 0.0307 | 0.0516 | 0.0002 | 0.0000 |  |  |  |  |
| IL-17A | 0.9580 | 0.0247 | 0.0638 | 0.9535 | 0.0032 | 0.0004 | 0.0379 | 0.0419 | 0.0403 | 0.0238 | 0.0021 |  |  |  |
| TNF-α | 0.4186 | 0.3787 | 0.0255 | 0.1002 | 0.0852 | 0.0209 | 0.0937 | 0.7119 | 0.0110 | 0.0119 | 0.0852 | 0.2166 |  |  |
| Muc5ac | 0.5379 | 0.0105 | 0.0648 | 0.5470 | 0.0001 | 0.0055 | 0.0043 | 0.0713 | 0.0016 | 0.0006 | 0.0000 | 0.0000 | 0.0123 |  |
| -logPC100 | 0.3658 | 0.0804 | 0.1091 | 0.5697 | 0.0378 | 0.0002 | 0.1257 | 0.1107 | 0.0098 | 0.0073 | 0.0262 | 0.0008 | 0.1503 | 0.0039 |

**Figure S1-*Typical picture of Flow-volume Curve***

***
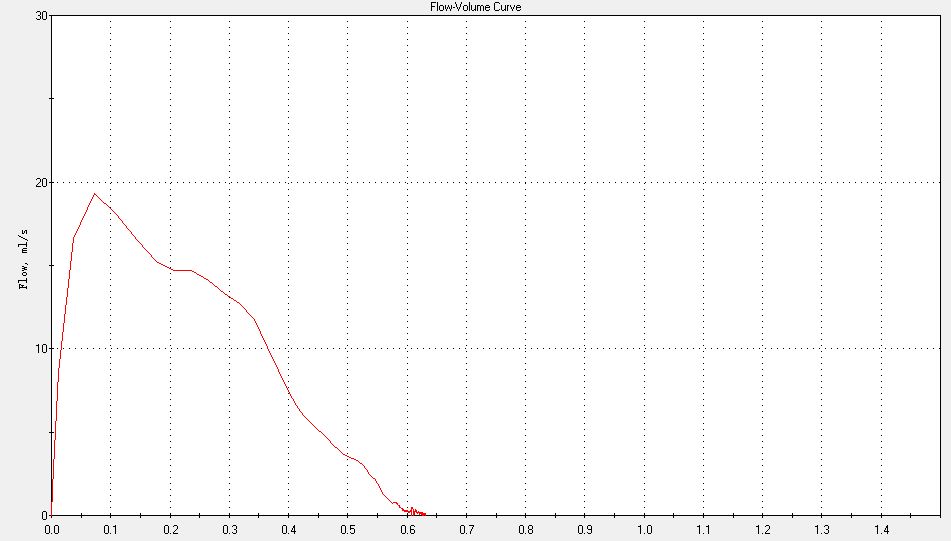
***

**X-axis: time (s)**

**Y-axis: volume (ml)**

**Figure S2-*Schematic diagram of mouse experiment***


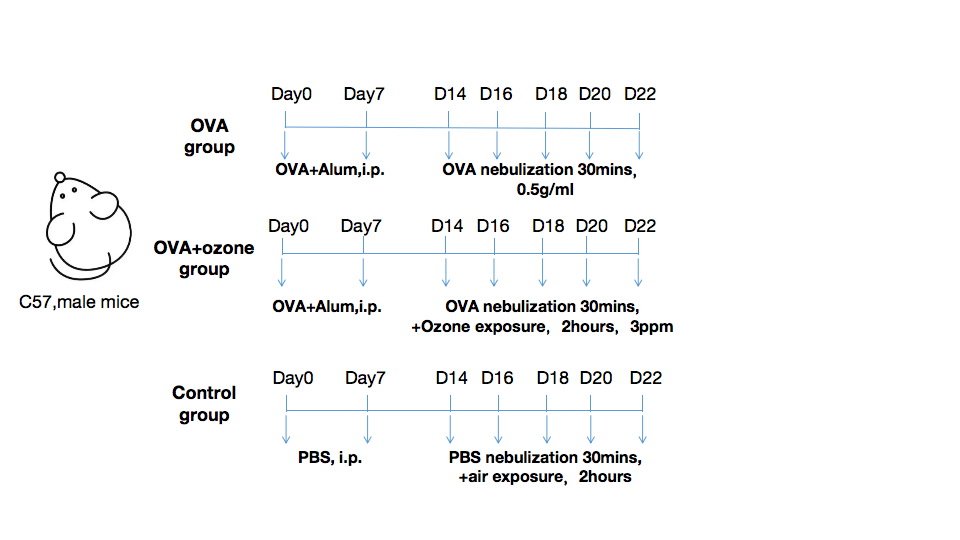


**Figure S3-*Correlation between α-SMA positive area% and airway function***

***
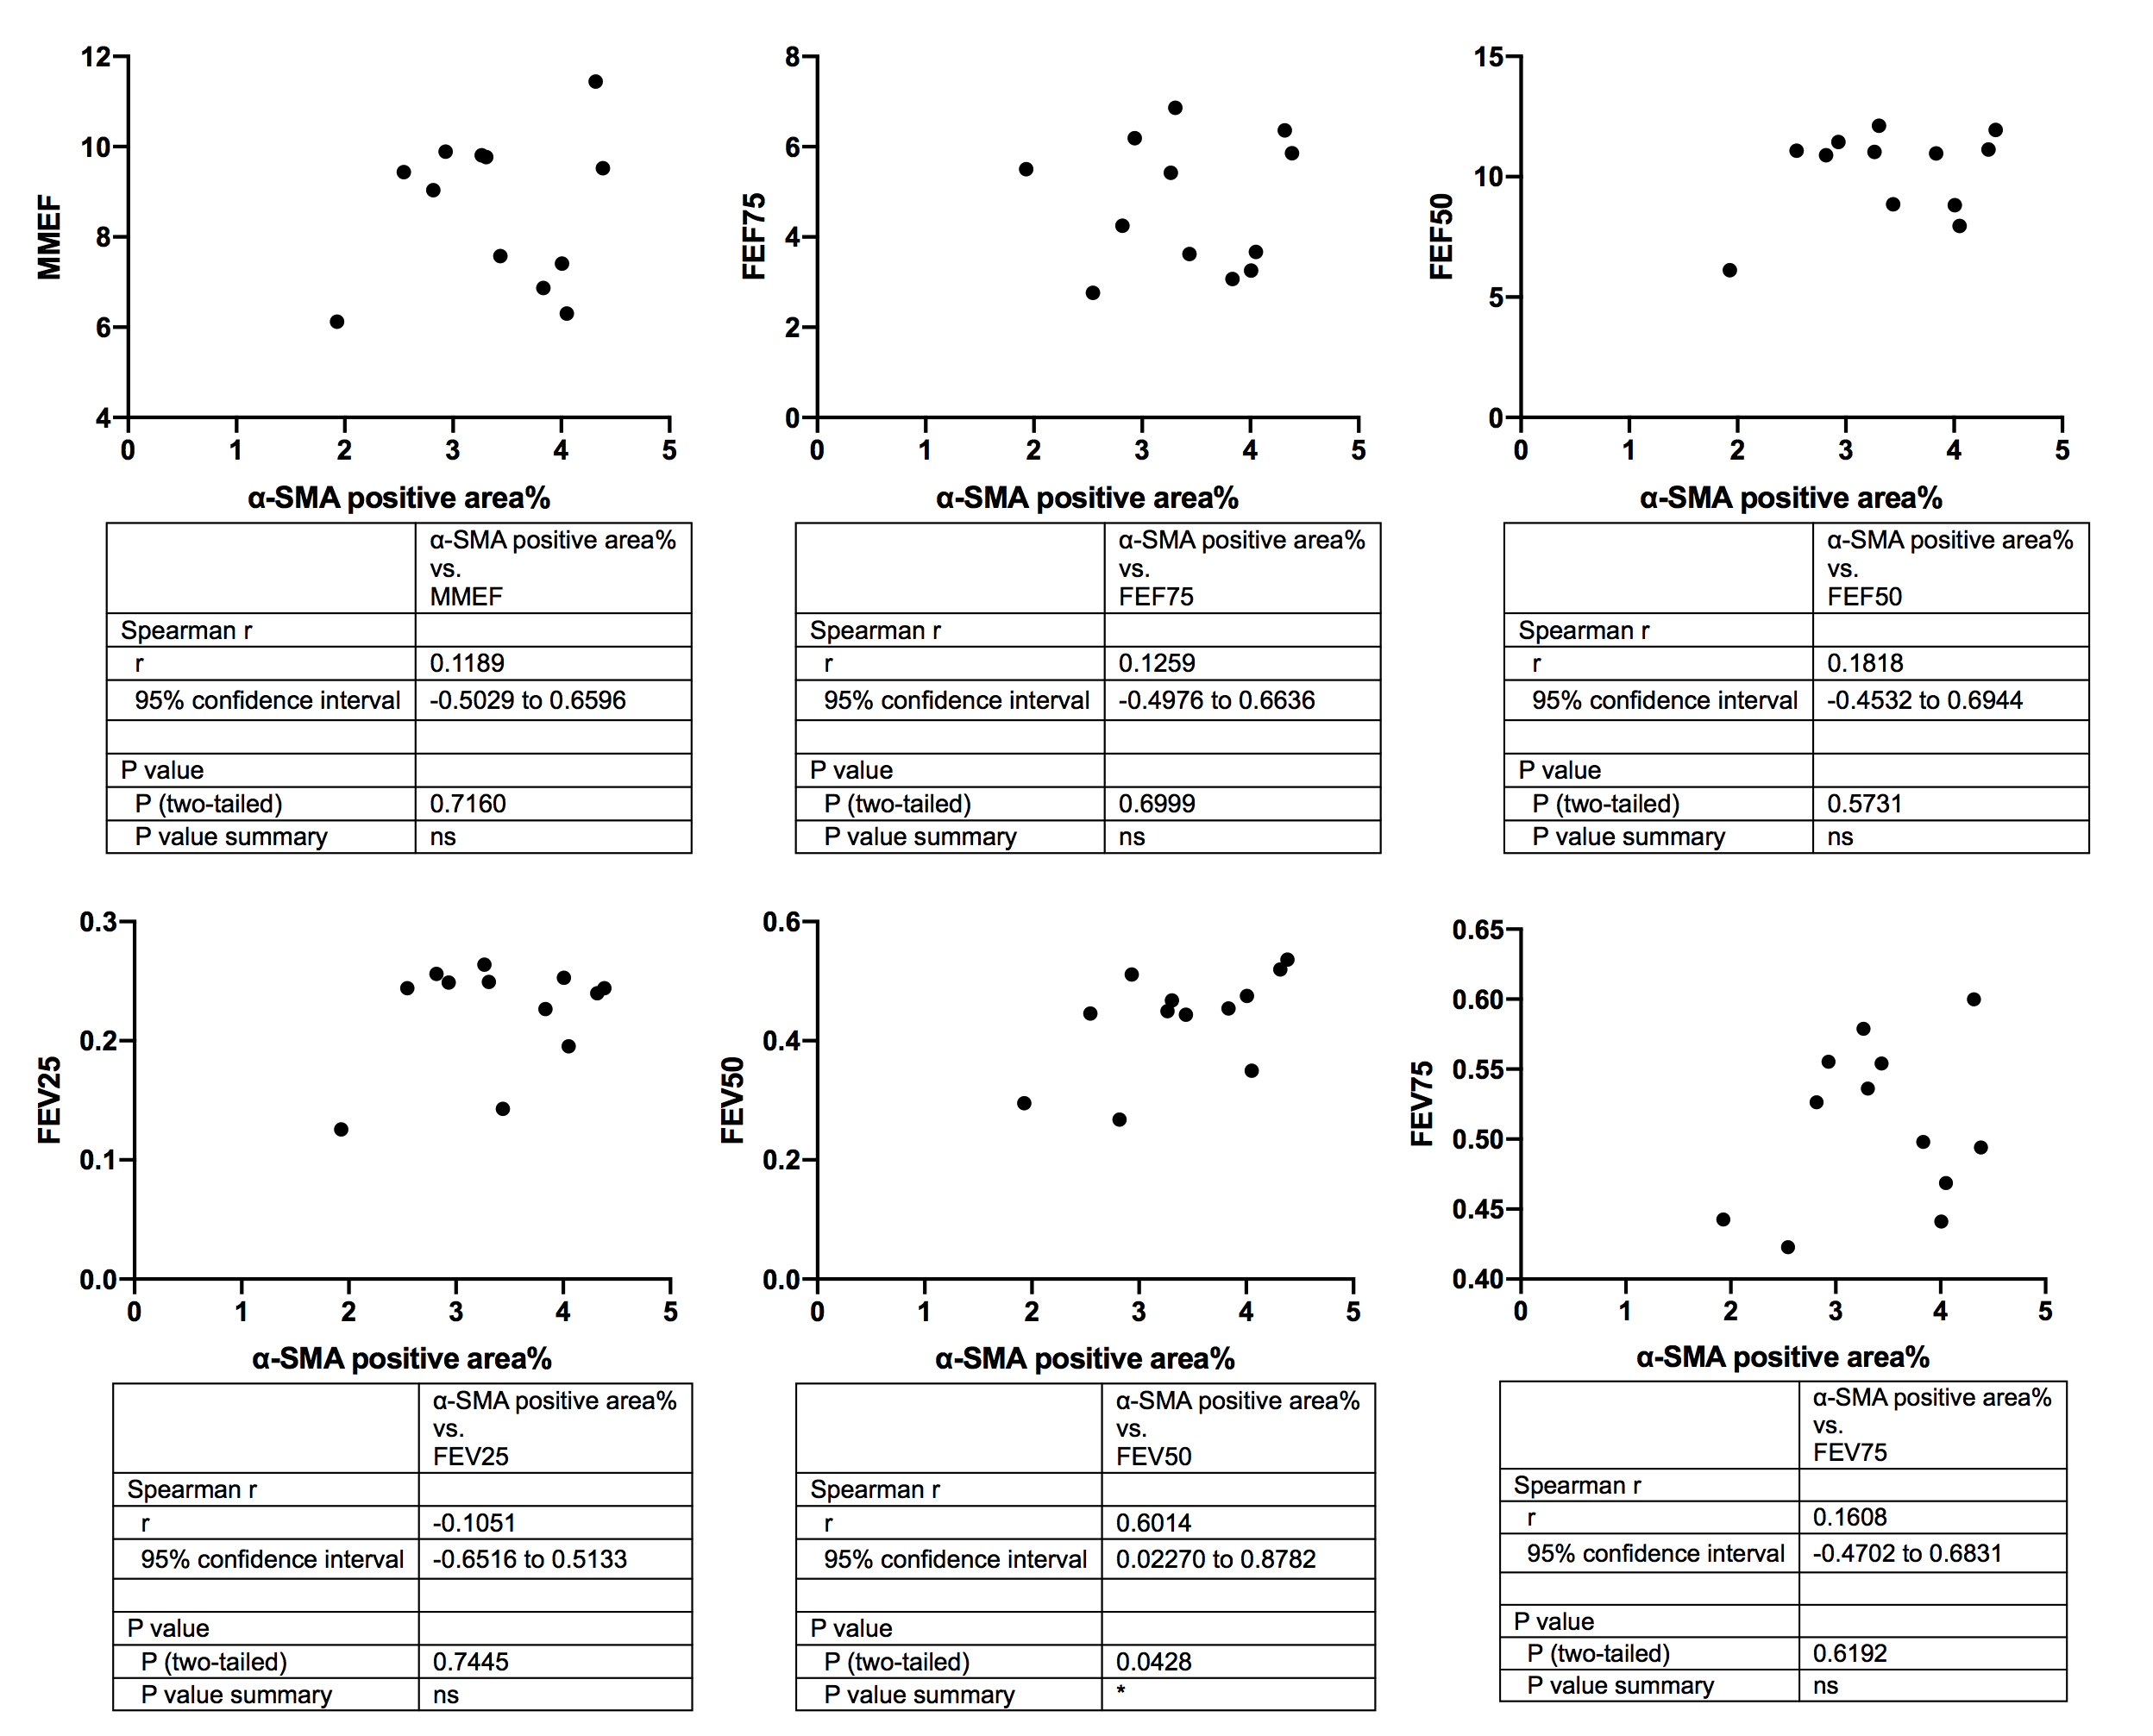
***
